# Supplementary material
Source: PubMed Central journal article supplement (PMC9244301)
Supplement: 12630_2022_2271_MOESM1_ESM.pdf [file 12630_2022_2271_MOESM1_ESM.pdf]

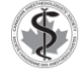

## ELECTRONIC SUPPLEMENTARY MATERIAL

### **Ziafat K *et al.*: Opioid dispensing after Cesarean delivery in British Columbia: a historical cohort analysis from 2004 to 2019**

*Disclaimer: Electronic Supplementary Material (ESM) is supplied by the authors for the benefit of readers. This feature is intended to provide additional information, context, and/or dimension to complement articles. Readers should be aware that unlike the main print manuscript, ESM may not undergo extensive peer review and typically is posted as supplied by the authors without editing, proofreading, accuracy checking, copyediting, or typesetting; it is published online only.*

#### TABLE OF CONTENTS

- eTable 1** ICD-10 classification codes for Cesarean delivery procedures
- eTable 2** List of opioid drugs used in the study
- eTable 3** List of cancer diagnoses as classified by ICD-9 codes
- eTable 4** CIHI hospital peer group classification
- eFig. 1** The distribution of hospitals by their rates of change, in 2007–2013, measured by the mean annual change in percentage of patients dispensed opioids from community pharmacies within seven days after discharge post Cesarean delivery in British Columbia
- eFig. 2** Mean percentage of patients dispensed opioids within seven days after discharge post Cesarean delivery in hospitals with rising rates, in contrast to declining rates elsewhere. Vertical error bars (not shown for all points to enhance visual clarity) indicate 95% confidence intervals

**eFig. 3** Mean percentage of patients dispensed  $< 25$  or  $\geq 25$  tablets of codeine or tramadol, post Cesarean delivery, showing a change after the BC government's April 2016 declaration that the opioid overdose epidemic was a public health emergency

**eTable 1** ICD-10 classification codes for Cesarean delivery procedures

| Classification code type                      | Detailed list                                                                                                                                                                                                                                                                                                                                                                                                                                                                                                               |
|-----------------------------------------------|-----------------------------------------------------------------------------------------------------------------------------------------------------------------------------------------------------------------------------------------------------------------------------------------------------------------------------------------------------------------------------------------------------------------------------------------------------------------------------------------------------------------------------|
| ICD-10 Cesarean section procedure classifiers | Classical section (vertical incision in upper segment): 5.MD.60.JZ, 5.MD.60.KA, 5.MD.60.JY, 5.MD.60.CC<br>Extraperitoneal section:<br>5.MD.60.KC, 5.MD.60.KD, 5.MD.60.KB, 5.MD.60.CD<br>Inverted T incision: 5.MD.60.RA, 5.MD.60.RB, 5.MD.60.KG, 5.MD.60.CE<br>Laparotomy (for abdominal pregnancy): 5.MD.60.RE, 5.MD.60.RF, 5.MD.60.KF<br>Lower segment transverse incision: 5.MD.60.JW, 5.MD.60.JX, 5.MD.60.AA, 5.MD.60.CF<br>Other type of cesarean delivery section NEC: 5.MD.60.RG, 5.MD.60.RH, 5.MD.60.KT, 5.MD.60.CG |

ICD-10 = International Statistical Classification of Diseases and Related Health Problems, 10th Revision

**eTable 2** List of opioid drugs used in the study

|              |                                                                                                                                                                                                                                                    |
|--------------|----------------------------------------------------------------------------------------------------------------------------------------------------------------------------------------------------------------------------------------------------|
| Opioid drugs | ANILERIDINE, BUTORPHANOL, CODEINE*, PROPOXYPHENE, FENTANIL, FENTANYL, HYDROCODONE, HYDROMORPHONE*, MALBUPHINE, MEPERIDINE, METHADONE, MORPHINE, NALBUPHINE, OPIUM, OXYCODONE*, PENTAZOCINE, PETHIDINE, SUBOXONE, SUFENTANIL, TAPENTADOL, TRAMADOL* |
|--------------|----------------------------------------------------------------------------------------------------------------------------------------------------------------------------------------------------------------------------------------------------|

\*Most commonly prescribed opioids in the cohort

**eTable 3** List of cancer diagnoses as classified by ICD-9 codes

| Classification code type | Detailed list                                                                                                                                                                                                                                                                                                                              |
|--------------------------|--------------------------------------------------------------------------------------------------------------------------------------------------------------------------------------------------------------------------------------------------------------------------------------------------------------------------------------------|
| ICD-9 cancer classifiers | 140,141,142,143,144,145,146,147,148,149,150,151,152,153, 154, 155, 156, 157, 158, 159, 160, 161, 162, 163, 164, 165, 166, 167, 168, 169, 170, 171, 172, 174, 175, 176, 177, 178, 179, 180, 181, 182, 183, 184, 185, 186, 187, 188, 189, 190, 191, 192, 193, 194, 195, 196, 197, 198, 199, 200, 201, 202, 203, 204, 205, 206, 207, 208, 209 |

Note: more information on ICD-9 codes can be found [here](#)  
 ICD-9 = International Classification of Diseases, Ninth Revision

**eTable 4** CIHI hospital peer group classification

| CIHI hospital peer group classification* <sup>A,B</sup> | Criteria                                                                                                                                                                                                                                                                    |
|---------------------------------------------------------|-----------------------------------------------------------------------------------------------------------------------------------------------------------------------------------------------------------------------------------------------------------------------------|
| Teaching Hospitals                                      | Hospitals that meet at least 1 of the following criteria: <ul style="list-style-type: none"><li>• Have confirmed teaching status from the provincial ministry</li><li>• Identified as teaching in the provincial ministry submission to the Canadian MIS Database</li></ul> |
| Community—Large Hospitals                               | Hospitals that meet 2 of the following criteria: <ul style="list-style-type: none"><li>• More than 8,000 inpatient cases</li><li>• More than 10,000 weighted cases</li><li>• More than 50,000 inpatient days</li></ul>                                                      |
| Community—Large Hospitals                               | Hospitals that do not meet the above criteria and have 2,000 or more weighted cases                                                                                                                                                                                         |
| Community—Small Hospitals                               | Hospitals that do not meet the above criteria and have fewer than 2,000 weighted cases                                                                                                                                                                                      |

\* Content reproduced in accordance with permissions laid out by the CIHI<sup>B</sup> and full acknowledgment of the CIHI (Ottawa, ON, Canada) as the copyright owner

CIHI = Canadian Institute for Health Information; MIS = Management Information System

<sup>A</sup> *Canadian Institute for Health Information. Your Health System 2021. Available from URL: [http://yourhealthsystem.cihi.ca/static/assets/hsp\\_pro/build/download/All\\_Results\\_Export.xlsx](http://yourhealthsystem.cihi.ca/static/assets/hsp_pro/build/download/All_Results_Export.xlsx) (accessed April 2022).*

<sup>B</sup> *Canadian Institute for Health Information. Indicator Library: Peer Group Methodology, November 2019. Available from URL: [https://www.cihi.ca/sites/default/files/document/peer-group-methodology\\_en.pdf](https://www.cihi.ca/sites/default/files/document/peer-group-methodology_en.pdf) (accessed April 2022).*

**eFig. 1** The distribution of hospitals by their rates of change, in 2007–2013, measured by the mean annual change in percentage of patients dispensed opioids from community pharmacies within seven days after discharge post Cesarean delivery in British Columbia

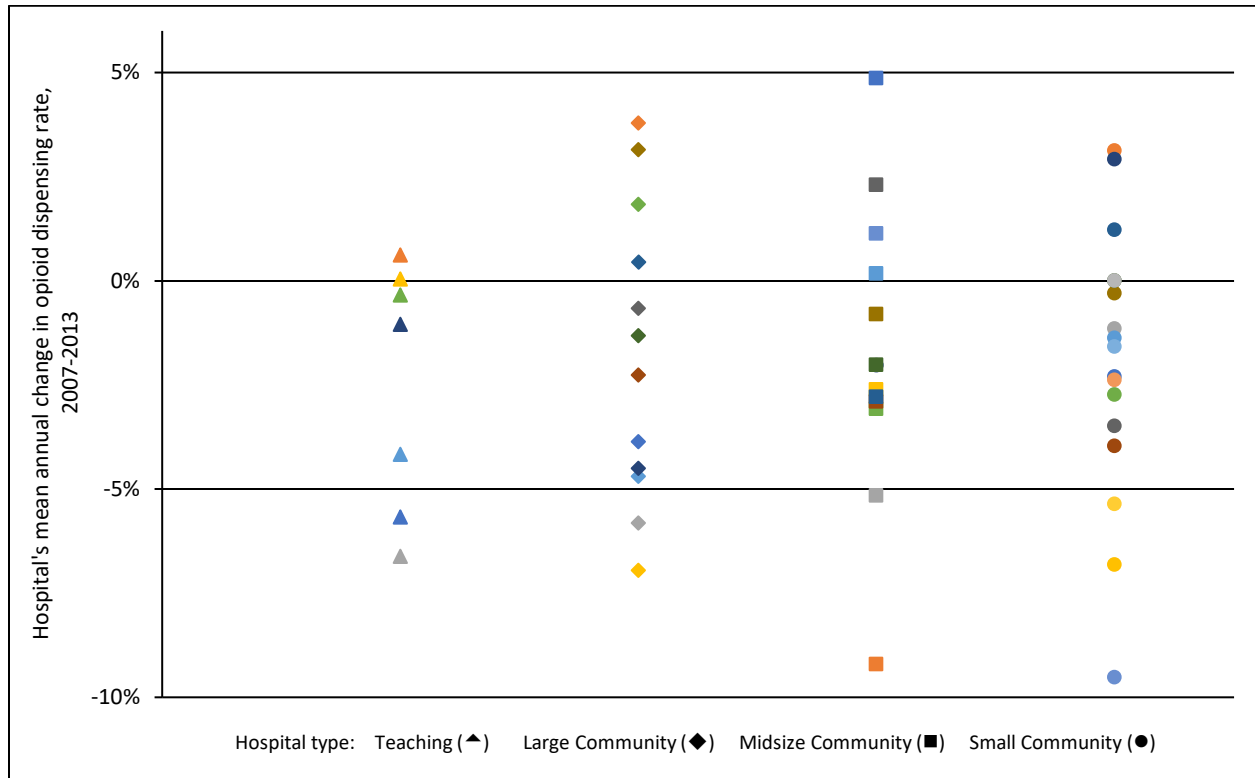

Hospital peer group types are described above in eTable 4.

**eFig. 2** Mean percentage of patients dispensed opioids within seven days after discharge post Cesarean delivery in hospitals with rising rates, in contrast to declining rates elsewhere. Vertical error bars (not shown for all points to enhance visual clarity) indicate 95% confidence intervals

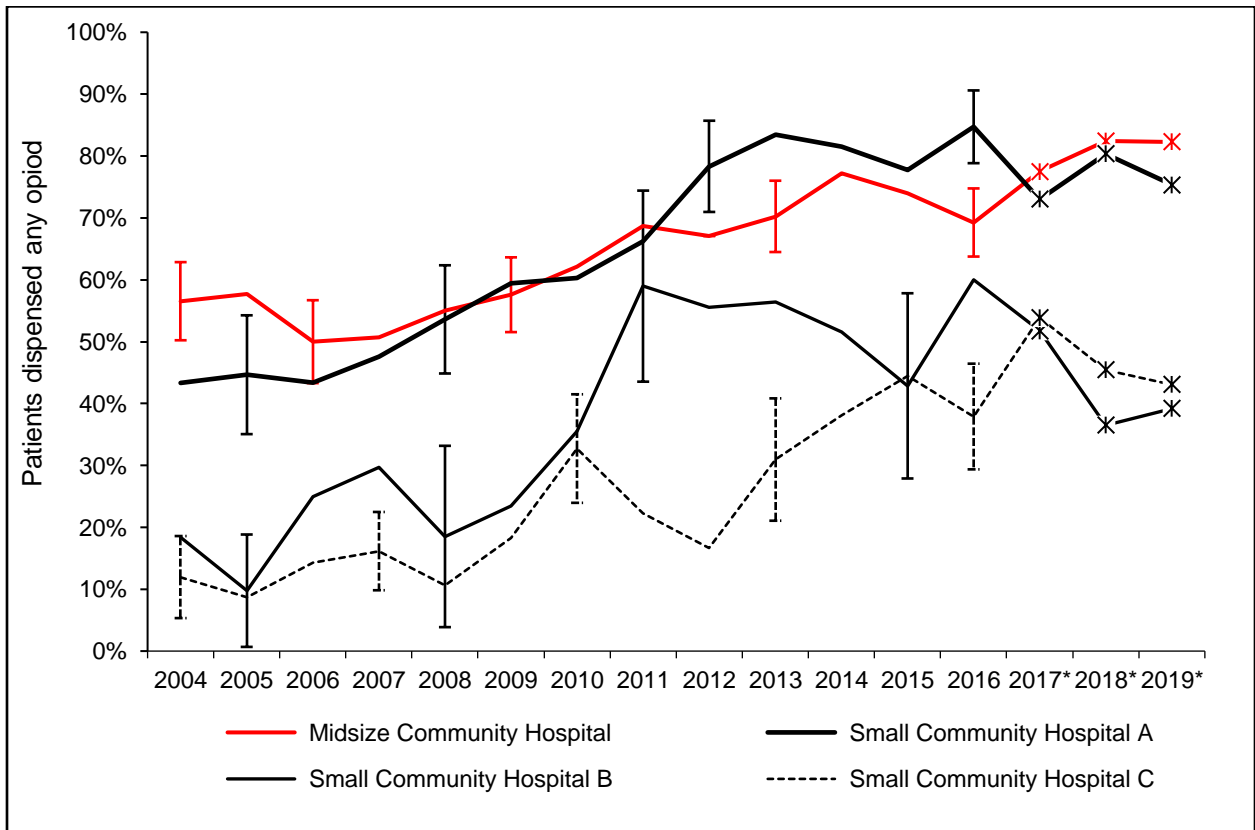

\*Estimated rates 2017–2019, based on trends observed in the Surgical Quality Outcome Reports Extension study

**eFig. 3** Mean percentage of patients dispensed < 25 or ≥ 25 tablets of codeine or tramadol, post Cesarean delivery, showing a change after the BC government’s April 2016 declaration that the opioid overdose epidemic was a public health emergency

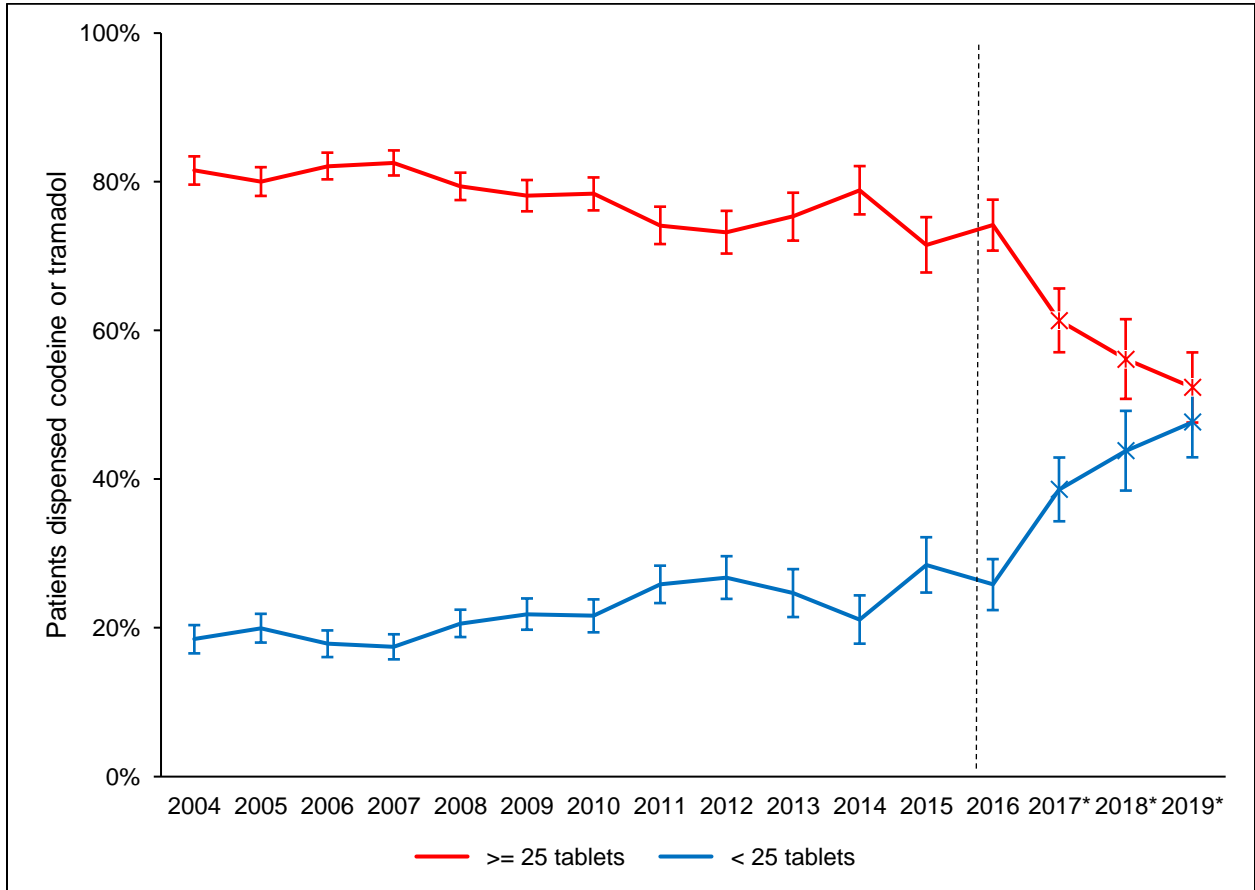

\*Estimated percentages in 2017–2019 were based on trends in the Surgical Quality Outcome Reports Extension study

Hydromorphone and oxycodone tablet numbers were not included as they did not change significantly over those years. Vertical error bars indicate approximate 95% confidence intervals, widened by a Bonferroni correction to account for 5 comparisons (replacing the critical value of 1.96 with 2.56).
